# Supplementary material
Source: Springer Nature journal article supplement (https://www.springermedizin.de/resource/supplementary/12936_2011_1914_MOESM2_ESM.pdf/9542052)

### A. Initial place for treatment

(N=1,617 fevers)

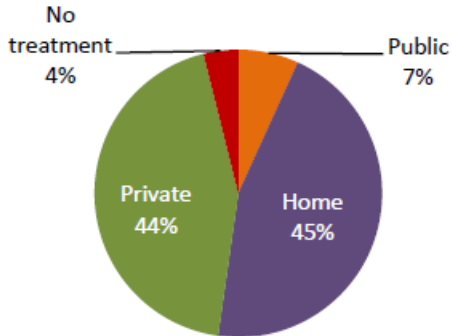

### B. Treatment-seeking sector, among those seeking treatment outside of the home

(N=1,386 fevers)

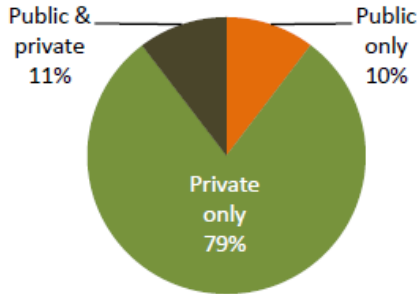

Supplement: MOESM2 [file 9542052]
